# Supplementary material for: Inhibition of lung serine proteases in mice: a potentially new approach to control influenza infection
Source: Springer Nature journal article supplement (doi:10.1186/1743-422x-8-27), 2011-01-20

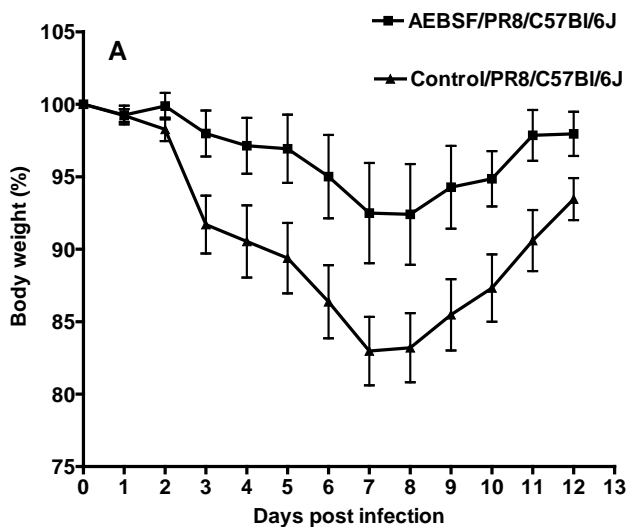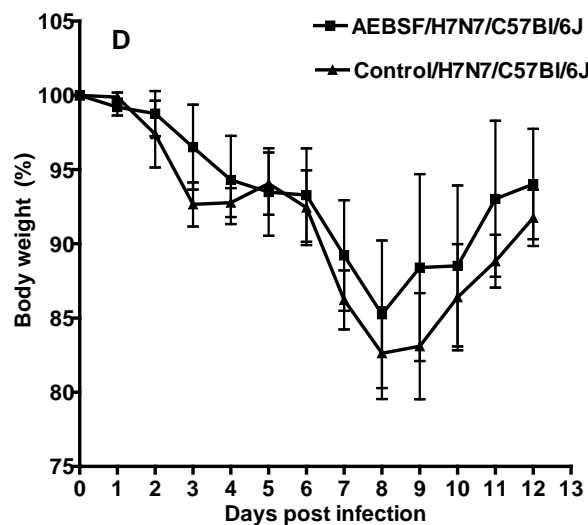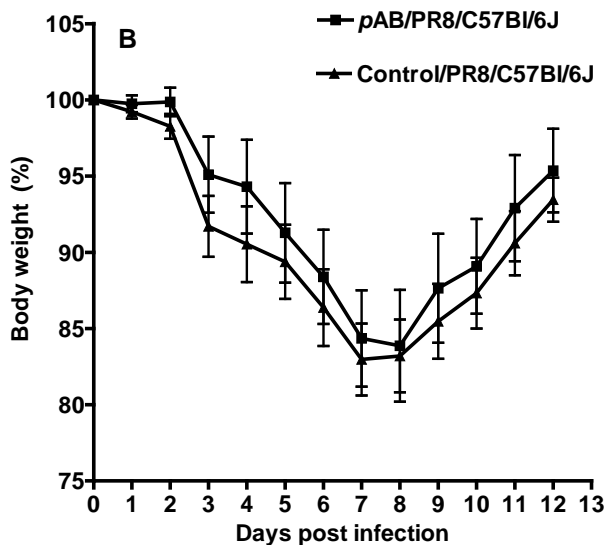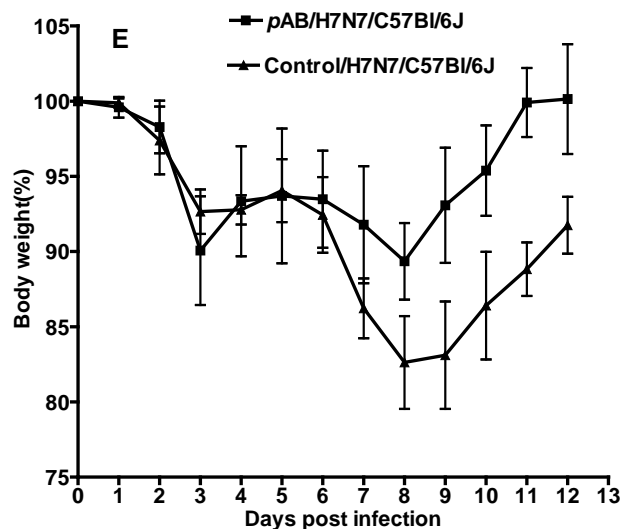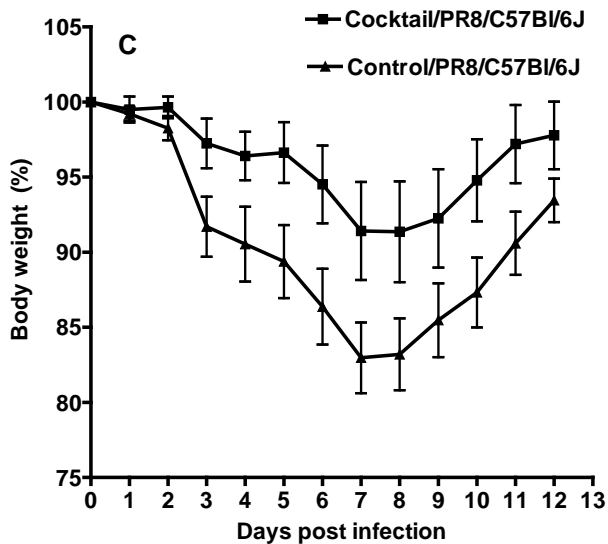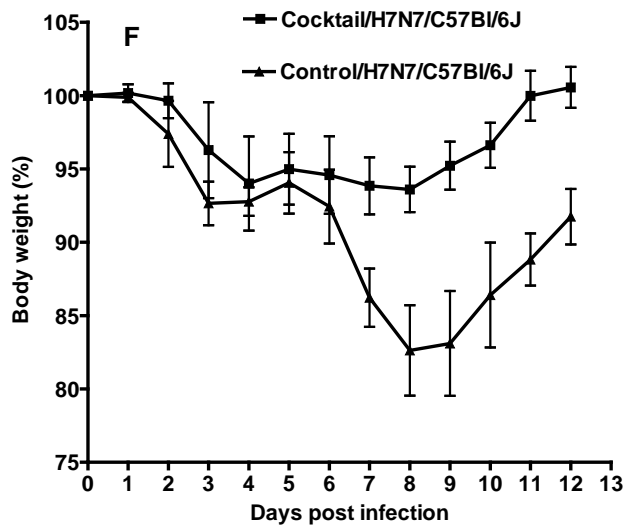

Supplement: 12985_2010_1144_MOESM4_ESM.pdf [file 12985_2010_1144_MOESM4_ESM.pdf]
